# Supplementary material
Source: Springer Nature journal article supplement (https://www.springermedizin.de/resource/supplementary/13046_2011_481_MOESM2_ESM.pdf/9662308)

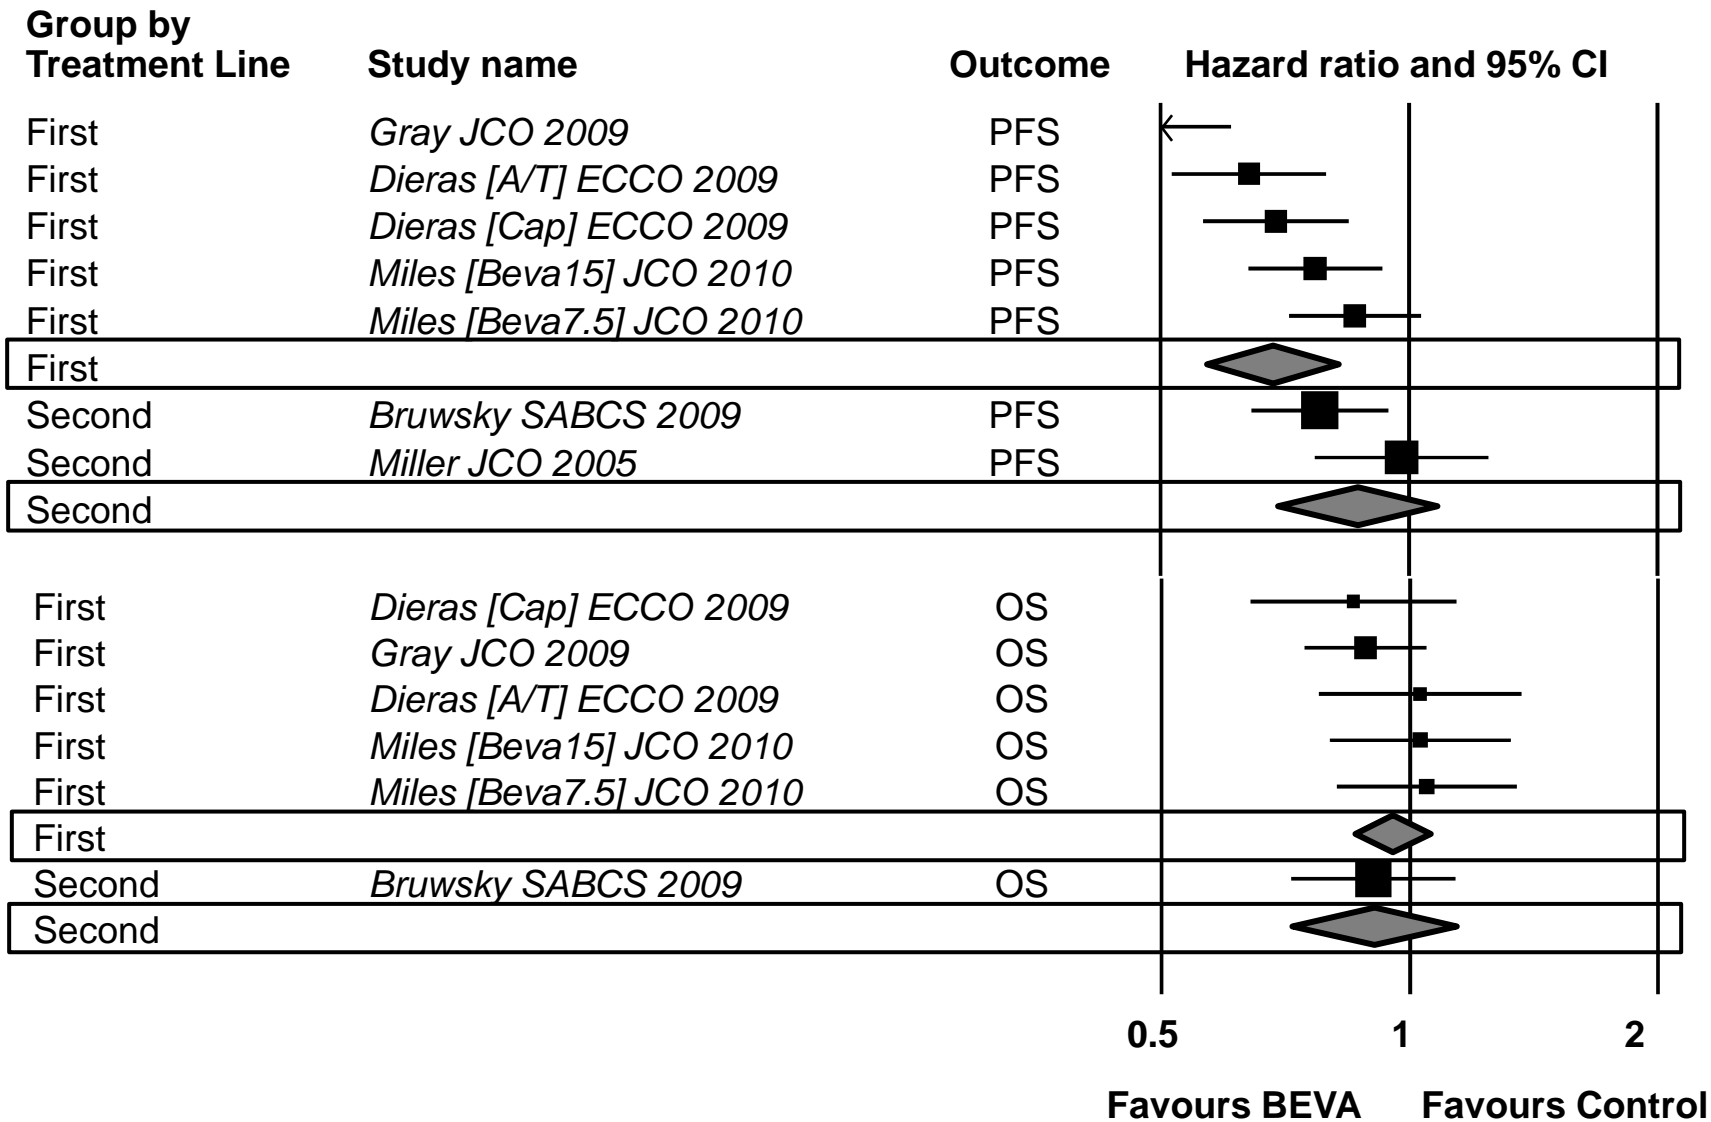

Supplement: MOESM2 [file 9662308]
